1                   **Antibody recognition of the Pneumovirus fusion protein trimer interface**

2

3                   Jiachen Huang,<sup>1,2</sup> Darren Diaz,<sup>1,2</sup> Jarrod J. Mousa<sup>1,2\*</sup>

4

5                   (1) Department of Infectious Diseases, College of Veterinary Medicine, University of

6                                           Georgia, Athens, GA 30602

7

8                   (2) Center for Vaccines and Immunology, College of Veterinary Medicine, University of

9                                           Georgia, Athens, GA 30602

10

11                   [\\*jarrod.mousa@uga.edu](mailto:*jarrod.mousa@uga.edu)

12

13 **Abstract**

14 Human metapneumovirus is a leading cause of viral respiratory infection in children, and can  
15 cause severe lower respiratory infection in infants, the elderly, and immunocompromised patients.  
16 However, there remain no licensed vaccines or specific treatments for hMPV infection. Although  
17 the hMPV fusion (F) protein is the sole target of neutralizing antibodies, the immunological  
18 properties of hMPV F are still poorly understood. To further define the humoral immune response  
19 to the hMPV F protein, we isolated two new human monoclonal antibodies (mAbs), MPV458 and  
20 MPV465. Both mAbs are neutralizing *in vitro* and target a unique antigenic site harbored within  
21 the trimeric interface of the hMPV F protein. We determined both MPV458 and MPV465 have  
22 higher affinity for monomeric hMPV F than trimeric hMPV F. MPV458 was co-crystallized with  
23 hMPV F, and the mAb primarily interacts with an alpha helix on the F2 region of the hMPV F  
24 protein. Surprisingly, the major epitope for MPV458 lies within the trimeric interface of the hMPV  
25 F protein, suggesting significant breathing of the hMPV F protein must occur for hMPV F protein  
26 recognition of the novel epitope. In addition, significant glycan interactions were observed with a  
27 somatically mutated light chain framework residue. The data presented identifies a novel epitope  
28 on the hMPV F protein for structure-based vaccine design, and provides a new mechanism for  
29 human antibody neutralization of viral glycoproteins.

30

## 31 **Introduction**

32 Human metapneumovirus (hMPV) is a leading cause of viral respiratory infections in children, the  
33 majority of which are seropositive for hMPV by five years of age<sup>1</sup>. Although hMPV was discovered  
34 in 2001<sup>2</sup>, there are no vaccines or therapeutics approved to prevent or treat viral infection. Similar  
35 to other respiratory pathogens, children, the elderly, and the immunocompromised are the major  
36 groups for which hMPV infection may require hospitalization<sup>3–11</sup>. Several reports have  
37 demonstrated hMPV infection can be lethal in both adults and children. In particular, haemopoietic  
38 stem cell transplant patients are at high risk of severe hMPV infection<sup>10–13</sup>, and several outbreaks  
39 of hMPV in nursing homes have been reported<sup>14–16</sup>. In addition, fatal hMPV has been observed in  
40 one child during an outbreak of hMPV in a daycare center.<sup>17</sup> hMPV is also a significant cause of  
41 febrile respiratory illness in HIV-infected patients<sup>18</sup>, and has been linked to exacerbations of  
42 chronic obstructive pulmonary disease<sup>19</sup>. Co-circulation of hMPV was observed during the SARS  
43 outbreak of 2003, suggesting interactions with other circulating respiratory viruses.<sup>20–22</sup>

44  
45 hMPV circulates as two genotypes, A and B, and based on the sequence variability of the surface  
46 proteins, hMPV is further grouped into four subgroups, A1, A2, B1, and B2<sup>23,24</sup>, and two additional  
47 subgroups, A2a and A2b, have been proposed<sup>12</sup>. hMPV has three surface glycoproteins, the small  
48 hydrophobic (SH), the attachment (G), and the fusion (F) proteins. The hMPV SH protein has  
49 been demonstrated to have viroporin activity<sup>25</sup>, while the hMPV G protein is thought to be involved  
50 in cellular attachment<sup>26</sup>. The hMPV F protein is indispensable for hMPV infection, and is highly  
51 conserved among hMPV subgroups<sup>27</sup>. Furthermore, the hMPV F protein is the sole target of  
52 neutralizing antibodies<sup>28</sup>. While the RSV G protein is immunogenic and elicits neutralizing  
53 antibodies<sup>29</sup>, the hMPV G protein is immunogenic, yet hMPV G-specific antibodies are non-  
54 neutralizing<sup>1</sup>. Although the hMPV G protein is thought to interact with proteoglycans, the hMPV F  
55 protein can interact with glycans in the absence of hMPV G.<sup>30</sup> The hMPV F protein contains a  
56 highly conserved RGD motif that has been proposed as a key region in receptor binding to cellular

57 integrins.<sup>31,32</sup> The entry mechanisms of hMPV into the host cell membrane can occur by cell  
58 membrane or endosomal membrane fusion<sup>33</sup>.

59

60 Both hMPV and the related respiratory syncytial virus (RSV) share the *Pneumoviridae* family, and  
61 a similar F protein that has approximately 30% homology between the two viruses. For both  
62 viruses, the F protein has two long-lived conformations, the pre-fusion and post-fusion states<sup>34</sup>.

63 Both RSV and hMPV lacking the G protein can infect cells *in vitro*, although these viruses are  
64 attenuated *in vivo*<sup>35</sup>. The pre-fusion conformation of the F protein is meta-stable, and stabilized

65 versions of both hMPV F<sup>36</sup> and RSV F<sup>37,38</sup> have been generated. The RSV F protein was initially  
66 stabilized in the pre-fusion conformation using cysteine substitutions to lock the protein in the pre-

67 fusion state by disulfide bonds, and through cavity-filling mutations to prevent transition to the  
68 post-fusion state. This Ds-Cav1 construct has been developed for clinical trials has shown

69 promise in a phase I clinical trial<sup>39</sup>. Additional constructs for RSV F have focused on stabilizing  
70 the  $\alpha 4$ – $\alpha 5$  loop through proline mutations<sup>38</sup>. A similar approach was undertaken for the hMPV F

71 protein, whereby a S185P mutation was introduced to stabilize the pre-fusion conformation<sup>36</sup>. The  
72 hMPV F protein contains a single site that is cleaved to convert the polypeptide F<sub>0</sub> protein into the

73 meta-stable disulfide-linked F<sub>1</sub>-F<sub>2</sub> pre-fusion homotrimer. This is in contrast to RSV F, which  
74 contains two furin cleavage sites flanking the p27 peptide fragment. The cleavage enzyme for

75 hMPV F *in vivo* is currently unknown, although cleavage can be accomplished by trypsin *in vitro*<sup>40</sup>.  
76 Post-fusion hMPV F was generated by removing the fusion peptide and incorporating one furin

77 cleavage site from RSV F<sup>41</sup>. Based on these stabilized pre-fusion and post-fusion hMPV F  
78 constructs, X-ray crystal structures of the hMPV F protein from the A1 subgroup have been

79 determined in the pre-fusion and post-fusion conformations<sup>36,41</sup>. Both proteins were expressed in  
80 CV-1 cells using a vaccinia virus expression system, although stabilized versions for routine

81 HEK293F or CHO cell line expression have not yet been generated.

82 For RSV F, the pre-fusion conformation contains antigenic sites Ø<sup>42</sup> and V<sup>43</sup> located on the head  
83 of the F protein, which elicit the most potent neutralizing antibodies as compared to the post-  
84 fusion conformation<sup>42,43</sup>. Furthermore, the human antibody response to RSV infection is primarily  
85 focused on these pre-fusion-specific epitopes<sup>44</sup>. For hMPV F, data using human serum has shown  
86 that the preponderance of hMPV F-specific human antibodies bind both pre-fusion and post-  
87 fusion F conformations, which has been proposed is due to differential glycan positioning on the  
88 head of the hMPV F protein as compared to the RSV F protein<sup>36</sup>. Although several monoclonal  
89 antibodies (mAbs) have previously been isolated that recognize the hMPV F protein<sup>41,45–52</sup>, the  
90 predominant antigenic sites targeted by the human antibody response are unclear. A panel of  
91 rodent-derived mAbs was initially used to map the neutralizing epitopes on the hMPV F protein  
92 using viral escape mutants<sup>45,46</sup>. The known antigenic sites on the hMPV F protein include antigenic  
93 sites III, IV, and an unnamed site targeted by mAb DS7<sup>34</sup>. DS7 was isolated from a human phage  
94 display library<sup>47</sup>, and was co-crystallized with a fragment of the pre-fusion hMPV F protein<sup>53</sup>.  
95 Several mAbs isolated have been found to cross-neutralize RSV and hMPV, including MPE8<sup>49</sup>  
96 and 25P13<sup>50</sup> (site III), and 101F<sup>41</sup>, 54G10<sup>48</sup>, and 17E10<sup>51</sup> (site IV). In addition, we have recently  
97 isolated a panel of human mAbs targeting site III and the DS7 epitope<sup>52</sup>. One of these mAbs,  
98 MPV364, competes for binding at antigenic site III, but does not cross-react with RSV F,  
99 suggesting further examination of hMPV F epitopes is required. In this study, we isolated new  
100 human mAbs to further identify the epitopes on the hMPV F protein recognized by the human  
101 immune system.

102

## 103 **Results**

### 104 Isolation of human antibodies to the hMPV F protein

105 To further identify the major antigenic epitopes on the hMPV F protein, we isolated mAbs from  
106 human subjects using hybridoma technology<sup>54</sup>. As hMPV infection and exposure is not routinely  
107 tested in patients, and the majority of individuals are seropositive for hMPV infection<sup>55</sup>, we isolated

108 mAbs from two healthy human subjects. Two new mAbs were isolated against the recombinantly  
109 expressed hMPV B2 F protein (**Table S1**) expressed in HEK293F cells<sup>52</sup>. MPV458 and MPV465  
110 were isolated from two different donors, and have isotypes of IgG<sub>3</sub> and kappa, and IgG<sub>1</sub> and  
111 lambda, respectively. MPV458 utilizes V<sub>H</sub>3-30, J<sub>H</sub>3, D<sub>H</sub>2, V<sub>K</sub>1-33, and J<sub>K</sub>5, while MPV465 utilizes  
112 V<sub>H</sub>3-33, J<sub>H</sub>5, D<sub>H</sub>3-22, V<sub>L</sub>-47, and J<sub>L</sub>3. The heavy chain complementarity determining region  
113 (HCDR) 3 loop length differs dramatically between the two mAbs as the HCDR3 loop for MPV458  
114 is just eight amino acids, while MPV465 has a 21 amino acid long CDR3 loop (**Table S2**).

115

#### 116 Epitope identification

117 To identify the antigenic epitopes targeted by the isolated mAbs, we performed epitope binning  
118 using competitive biolayer interferometry<sup>56</sup>. Previously discovered mAbs with known antigenic  
119 epitopes were utilized as mapping controls, including mAbs 101F<sup>57</sup> (site IV), MPV196<sup>52</sup> and DS7<sup>47</sup>  
120 (DS7 epitope), and MPE8<sup>49</sup> and MPV364<sup>52</sup> (site III) (**Fig. 1A**). Anti-penta-HIS biosensors were  
121 loaded with the hMPV 130-BV F<sup>36</sup> protein and then loaded with one hMPV F-specific mAb,  
122 followed by exposure to a second mAb. mAbs MPV458 and MPV465 did not compete with any of  
123 the mapping control mAbs, yet competed for binding with each other, suggesting these two mAbs  
124 bind to a unique antigenic site on the hMPV F protein.

125

#### 126 Neutralization and binding properties

127 Plaque neutralization assays were performed to determine the neutralization properties of  
128 MPV458 and MPV465 against hMPV subgroup B2 (strain TN/93-32) and hMPV subgroup A2  
129 (strain CAN/97-83) *in vitro* (**Fig. 1B**). MPV458 neutralized hMPV with 50% inhibitory concentration  
130 (IC<sub>50</sub>) values of 33 ng/mL for MPV CAN/97-83 and 490 ng/mL for MPV TN/93-32, while MPV465  
131 had IC<sub>50</sub> values of 950 and 2700 ng/mL, respectively. The neutralization potency of MPV458 was  
132 comparable to mAbs MPE8 and 101F. We next determined the binding properties of MPV458  
133 and MPV465 by ELISA and biolayer interferometry. For ELISA, the half-maximal effective

134 concentration ( $EC_{50}$ ) values were used to quantify binding between mAbs across multiple hMPV  
135 F protein constructs (**Table S1, Fig. S1-S4**). Generating trimeric hMPV F can be achieved by  
136 treating purified protein with trypsin as previously described<sup>41,52</sup>, although this process generates  
137 batch to batch variation of both pre-fusion and post-fusion conformations<sup>52</sup>. Both mAbs bind to  
138 hMPV F proteins from all four hMPV F subgroups (**Fig. S5**). We also quantified binding to hMPV  
139 F constructs that were predominantly in the pre-fusion and post-fusion conformations (**Fig. S5**).  
140 No major differences were observed between the predominantly pre-fusion hMPV F 130-BV  
141 protein and the predominantly post-fusion hMPV B2 GCN4 6R F protein, indicating these mAbs  
142 bind both pre-fusion and post-fusion conformations. We next assessed binding to exclusively  
143 monomeric and trimeric hMPV B2 F proteins that were treated with trypsin to induce cleavage  
144 (**Fig. 1C**). Both mAbs MPV458 and MPV465 had stronger binding to monomeric hMPV F than to  
145 trimeric hMPV F. MPV458 had a nearly four-fold lower  $EC_{50}$  to monomeric hMPV B2 F than to  
146 trimeric hMPV B2 F. MPV465 bound well to the hMPV B2 F monomer, while binding was  
147 completely abrogated binding to the hMPV B2 F trimer. These data indicate the epitope for  
148 MPV458 and MPV465 is predominantly exposed on monomeric hMPV F. Binding avidity and  
149 affinity were assessed by biolayer interferometry using the predominantly pre-fusion hMPV 130-  
150 BV protein (**Fig. 1D**). Affinity measurements were completed by cleaving mAbs to Fab fragments.  
151 MPV458 Fab had a faster  $K_{ON}$  than MPV465 Fab and 101F Fab, and also had limited dissociation,  
152 which gave a  $K_D$  2-logs higher than MPV465 and 3-logs higher than 101F. Limited dissociation  
153 was observed for MPV458 and MPV465 IgG molecules as compared to 101F IgG, and thus a  
154  $K_{OFF}$  rate could not be obtained. Overall, these data indicate MPV458 has higher affinity for the  
155 hMPV 130-BV F protein than mAbs MPV465 and 101F.

156

#### 157 X-ray crystal structure of the hMPV B2 F + MPV458 complex

158 To fully define the epitope targeted by the newly isolated mAbs, we co-crystallized the Fab of  
159 MPV458 in complex with hMPV B2 F. Trypsinization of hMPV B2 F generated trimeric and

160 monomeric versions of hMPV F as assessed by size exclusion chromatography (**Fig. S6**).  
161 Cleavage of MPV458 and MPV465 mAbs to Fab fragments and subsequent addition of these  
162 Fabs to trypsinized trimeric hMPV B2 F resulted in monomeric hMPV F-Fab complexes (**Fig. S6**).  
163 Although the hMPV B2 F trimer appeared to fall apart upon Fab binding, we cannot attribute this  
164 to binding of MPV458 and MPV465 as other Fabs also caused trimer dissociation of this construct.  
165 The MPV458-hMPV B2 F complex was subjected to crystallization screening and crystals were  
166 obtained in 0.5 M ammonium sulfate, 0.1 M sodium citrate tribasic dihydrate pH 5.6, and 1.0 M  
167 Lithium sulfate monohydrate. Crystals were harvested and X-ray diffraction data was collected,  
168 and the structure of the complex was determined to 3.1 Å (**Fig 2, Table S3**). The asymmetric unit  
169 contained one hMPV F protomer with one MPV458-Fab molecule. hMPV F was observed in the  
170 pre-fusion conformation, although no trimeric structure was observed when viewing symmetry  
171 related partners (**Fig. S7**). MPV458 targets a unique epitope compared to previously discovered  
172 Pneumovirus antigenic sites. The primary epitope consists of a single alpha helix of amino acids  
173 66-87 of the F2 region (**Fig. 2A**). Compared to the hMPV F protein, MPV458 binds nearly  
174 perpendicular to the long axis of the F protein. Upon overlay with the previously determined X-ray  
175 crystal structure of pre-fusion hMPV F, it is clear the major epitope lies completely within the  
176 interface between two protomers of trimeric hMPV F (**Fig. 2B**). This unusual epitope suggests the  
177 hMPV F protein is partially monomeric on the surface of the virion envelope or on virally infected  
178 cells. Alternatively, substantial breathing of the hMPV F protein could take place to allow the  
179 antibody to bind and neutralize the virus. As mentioned earlier, MPV458 has an unusually short  
180 HCDR3 loop of just 8 amino acids. The HCDR3 and light chain CDR (LCDR) 3 are centered on  
181 the 66-87 helix region. Numerous hydrogen bonding events were clear in the electron density  
182 (**Fig. 2C, 2D, S8**). The HCDR3 interacts via Asp107 with Arg79 of hMPV F, while HCDR2 Asn64  
183 and Ser63 interact with Glu80 and Arg205, respectively (**Fig. 2C**). The HCDR1 utilizes Arg36 to  
184 interact with Glu70. The light chain LCDR3 has more hydrogen bonding events than the HCDR3,  
185 utilizing the backbone amino group of Leu114 to interact with Thr83, Arg115 hydrogen bonds to



186 Asp87, and Asp108 bonds to Lys82 (**Fig. 2D**). LCDR1 Arg37 interacts with Asn57, which has an  
187 extended N-linked glycan motif. The LCDR2 Asp56 interacts with Thr56. The Framework 3 loop  
188 of the light chain interacts with the glycan motif consisting of NAG-NAG-BMA with branched MAN  
189 residues off the BMA glycan, in which Tyr83 interacts with the extended MAN glycan, while the  
190 long-face of Tyr83 site parallel to the extended glycan, suggesting a favorable interaction with the  
191 glycan motif.

192

### 193 Functional characterization of the 66-87 helical epitope

194 The 66-87 helix of hMPV F is structurally conserved in the pre-fusion and post-fusion  
195 conformations, although the helix is exposed on the outer surface in the trimeric post-fusion  
196 conformation (**Fig. 3A, 3B**). Upon overlay of the 66-87 region of the pre-fusion and post-fusion  
197 hMPV F proteins, residues 66-83 align well, while the helix breaks on post-fusion hMPV F at  
198 residues 84-87 (**Fig. 3C**). This sequence identity of the helix is highly conserved, as residues are  
199 identical between the A1 and B2 subgroups, except for a Lys82/Arg82 mutation. As MPV458 and  
200 MPV465 exhibited binding to post-fusion hMPV F constructs, we further examined binding by  
201 attempting to generate a complex between the Fab of MPV458 and trypsinized hMPV B2 F that  
202 was in the post-fusion conformation (**Fig. S2, S9**). No complex was observed as assessed by size  
203 exclusion chromatography while the Fab of 101F formed a complex with the post-fusion hMPV F  
204 protein. This suggests that although binding is observed by ELISA, the complete epitope lies  
205 outside the 66-87 helix and is incomplete in the post-fusion conformation. Since the major epitope  
206 is focused on the single helix, we assessed binding by Western blot to determine if MPV458  
207 displayed binding to a linear conformation in the denatured hMPV F protein (**Fig. S10**). Binding  
208 to hMPV B2 F was analyzed using reduced and heated protein, and a nonreduced protein.  
209 MPV458 showed binding to all states of hMPV B2 F, while control mAbs 101F and MPE8 showed  
210 binding to only the nonreduced state. These data suggest the MPV458 epitope is at least partially  
211 linear. As the epitope for MPV458 lies within the trimer interface, the mechanism by which B cells

212 recognize this epitope is unclear. To determine if the MPV458 epitope is exposed on the surface  
213 of virally infected cells, we performed flow cytometry using MPV458, MPE8, and a negative  
214 control pneumococcal-specific antibody (**Fig. S11**). Both MPV458 and MPE8 induced a  
215 fluorescent shift in virally infected cells, while the negative control mAb did not. This indicates the  
216 MPV F protein is either in monomeric form on the surface of infected cells, or that hMPV F trimer  
217 exhibits breathing motion that allows for binding of MPV458. By comparing the binding sites with  
218 previously described hMPV F-specific mAbs that have been structurally characterized (MPE8,  
219 101F, DS7), the MPV458 epitope is distant from all three known antigenic sites (IV, VI, and III),  
220 and lies on the opposite face of the monomeric hMPV F protein (**Fig. 3D, 3E**). This unique epitope  
221 was unexpected on the hMPV F protein, although one intratrimeric epitope has recently been  
222 observed on the influenza hemagglutinin protein by mAb FluA-20<sup>58</sup>. However, FluA-20 was  
223 nonneutralizing and functioned by disrupting the HA trimer and inhibiting cell-to-cell spread.  
224 Evidence for Pneumovirus F protein breathing was previously demonstrated on the RSV F  
225 protein, whereby the mAb CR9501 that binds at antigenic site V enhances opening of the pre-  
226 fusion RSV F protein<sup>59</sup>.

227

## 228 **Discussion**

229 Here we demonstrate a new class of neutralizing hMPV F-specific human mAbs. The mAbs are  
230 broadly reactive across all hMPV subgroups, and neutralize viruses from both hMPV genotypes.  
231 The mAbs were discovered to bind to a novel epitope by competition with previously discovered  
232 rodent and human derived hMPV F-specific mAbs. The RSV F protein has at least two antigenic  
233 sites that are surface exposed on the head of the trimeric surface (antigenic sites Ø<sup>60</sup> and V<sup>42,43</sup>),  
234 however, such antigenic sites have not yet been identified for hMPV F, likely due to glycan  
235 shielding<sup>36</sup>. Furthermore, the X-ray crystal structure of one mAb, MPV458, was determined in  
236 complex with the hMPV F protein and solved to 3.1 Å. The structure revealed MPV458 binds at a  
237 newly defined epitope on the hMPV F protein defined by the alpha helical 66-87 amino acid region

238 contained within the F2 fragment on pre-fusion hMPV F. This new epitope is the first defined on  
239 the head of the hMPV F protein as previous mAbs identified have targeted the lower half of the  
240 protein<sup>41,48,50-53</sup>. The new epitope is nearly completely contained within the pre-fusion trimeric  
241 interface of the hMPV F protein, which is a unique feature among previously discovered human  
242 mAbs to viral glycoproteins. Although the mAbs were shown to bind both predominantly pre-fusion  
243 and post-fusion conformations of the hMPV F protein, preferential binding to pre-fusion hMPV F  
244 was observed as evidenced by our attempts to complex MPV458 and MPV465 with post-fusion  
245 hMPV F. These data indicate that while the 66-87 epitope is present in both pre-fusion and post-  
246 fusion conformations, the complete structural epitope is present only on pre-fusion hMPV F, as  
247 several contacts outside of the 66-87 region were observed in our X-ray crystal structure. These  
248 additional epitope residues are rearranged in the post-fusion conformation. Recently another  
249 class of human mAbs were isolated that target the influenza hemagglutinin protein<sup>58</sup>. The FluA-  
250 20-like mAbs were nonneutralizing, unlike the mAbs described here, which are the first human  
251 mAbs binding within the trimeric interface that neutralize a virus. As epitopes at the trimeric  
252 interface have now been determined for influenza virus<sup>58</sup> and human metapneumovirus, it is likely  
253 such epitopes are important for other type I fusion viral glycoproteins.

254

255 The mechanism by which mAbs MPV458 and MPV465 neutralize hMPV remains to be  
256 determined. The mAbs could inhibit the transition of the hMPV F protein from the pre-fusion to  
257 the post-fusion conformation, which is likely the mechanism for the majority of antibodies targeting  
258 Pneumovirus fusion proteins. Alternatively, the mAbs could prevent infection by disrupting the  
259 trimeric structure of the hMPV F protein. Currently, we do not have reliable pre-fusion constructs  
260 that could be used to examine this hypothesis. It is clear that MPV458 binds to the surface of  
261 infected cells as demonstrated by our analysis by flow cytometry, although it is unclear if the mAb  
262 is binding to trimeric or monomeric hMPV F on the cell surface. Since the 66-87 epitope is hidden  
263 within the trimeric interface of the previously determined X-ray crystal structure of pre-fusion

264 hMPV F<sup>36</sup>, a mechanism must occur whereby the hMPV F protein motion facilitates exposure of  
265 the epitope for MPV458 binding, and indeed for initial naïve B cell recognition of this epitope since  
266 these mAbs were derived from seropositive human subjects. This motion, termed “breathing” has  
267 previously been demonstrated for the RSV F protein by identification of an alternative  
268 conformation of the RSV F protein, whereby the mAb CR9501 causes opening of pre-fusion RSV  
269 F trimers, and RSV F was also found to be both monomeric and trimeric on the surface of  
270 transfected HEK293F cells<sup>59</sup>. Furthermore, breathing of influenza and HIV glycoproteins has also  
271 been described<sup>61,62</sup>, and mAbs to the HIV glycoprotein have been shown to destabilize the trimeric  
272 structure<sup>63</sup>. The mAb CR9501 targets antigenic site V of the RSV F protein, which was previously  
273 defined by the mAb hRSV90<sup>43</sup>. mAbs to a similar antigenic site V epitope on the hMPV F protein  
274 have not been identified, and MPV458 targets an epitope on the opposite face of monomeric  
275 hMPV F.

276  
277 Although we have identified a new antigenic site by isolating two mAbs from different donors, it  
278 remains unclear if such antibodies are a major part of the hMPV F humoral immune response. It  
279 also remains to be determined if mAbs such as MPV458 will protect against viral replication *in*  
280 *vivo*. Since the MPV458 epitope is partially linear, as evidenced by our binding studies to reduced  
281 hMPV F, a peptide-based vaccine based solely around this epitope may elicit neutralizing  
282 antibodies. Additionally, although MPV458 and MPV465 target a similar epitope based on epitope  
283 binning analysis, the binding properties to trimeric hMPV F are quite distinct. MPV458 shows  
284 binding to both monomeric and trimeric hMPV F constructs, while binding to trimeric hMPV F is  
285 completely eliminated for MPV465. Further structural analysis of the MPV465 epitope will  
286 delineate the differential binding properties. Our findings provide novel insights on the human  
287 antibody response to the hMPV F protein, and responses to viral glycoproteins. The X-ray crystal  
288 structure of the immune complex may guide the development of vaccines against hMPV. In

289 addition, MPV458 can be potentially applied to the treatment and prevention of hMPV infection if  
290 prophylactic efficacy is demonstrated in animal challenge models.

## 291 **Methods**

### 292 **Blood draws and informed consent.**

293 This study was approved by the University of Georgia Institutional Review Board as  
294 STUDY00005127. Healthy human donors were recruited to the University of Georgia Clinical and  
295 Translational Research Unit. After obtaining informed consent, 90 mL of blood was drawn by  
296 venipuncture into 9 heparin-coated tubes, and 10 mL of blood was collected into a serum  
297 separator tube. Peripheral blood mononuclear cells (PBMCs) were isolated from human donor  
298 blood samples using Ficoll-Histopaque density gradient centrifugation, and PBMCs were frozen  
299 in the liquid nitrogen vapor phase until further use.

300

### 301 **Production and purification of recombinant hMPV F proteins.**

302 Plasmids encoding cDNAs for hMPV F proteins listed in **Table S1** were synthesized (GenScript)  
303 and cloned into the pcDNA3.1+ vector. The plasmids were expanded by transformation in  
304 *Escherichia coli* DH5 $\alpha$  cells with 100  $\mu$ g/mL of ampicillin (Thermo Fisher Scientific) for selection.  
305 Plasmids were purified using the EZNA plasmid maxi kit (Omega BioTek), according to the  
306 manufacturer's protocol. To generate stable cell lines that express hMPV B2 F, hMPV B2 F-  
307 GCN4, and hMPV F 130-BV, Expi293F (Thermo Fisher Scientific) cells were plated into a 12 well  
308 plate ( $4 \times 10^5$  per well) with 1 mL of growth medium (Dulbecco's Modified Eagle Medium (Corning),  
309 10% fetal bovine serum (Corning)) 1 day before transfection. For each milliliter of transfection, 1  
310  $\mu$ g of plasmid DNA was mixed with 4  $\mu$ g of 25,000-molecular-weight polyethylenimine (PEI;  
311 PolySciences Inc.) in 66.67  $\mu$ l Opti-MEM cell culture medium (Gibco). After 30 min, the DNA-PEI  
312 mixture was added to HEK293F cells in Opti-MEM. After 3 to 4 days, 20  $\mu$ l of cell culture  
313 supernatant was used for Western blot to determine protein expression. Then, the culture medium  
314 was replaced with 1 mL growth medium supplemented with G418 (Geneticin; VWR) antibiotic to  
315 a final concentration of 250  $\mu$ g/mL. After 2-3 days, HEK293F cells were resuspended with the  
316 growth medium supplemented with G418, and expanded to a 25-cm<sup>2</sup> cell culture flask. Cells were

317 trypsinized once they reach 80-90% confluency and further expanded to a 75-cm<sup>2</sup> cell culture  
318 flask. Again, at 80-90% confluency, trypsinized the cells were transferred to 250 mL flask in 100  
319 mL 293 Freestyle medium (Gibco) supplemented with G418 and cultured in shaking incubator at  
320 37°C with 5% CO<sub>2</sub>. For protein expression and purification, the stable cell lines were expanded in  
321 500 mL of Freestyle293 medium supplemented with G418. The remaining constructs are  
322 expressed by transient transfection of Expi293F cells. After 5 to 7 days, the cultures were  
323 centrifuged to pellet the cells, and the supernatants were filtered through a 0.45-µm sterile filter.  
324 Recombinant proteins were purified directly from the filtered culture supernatants using HisTrap  
325 Excel columns (GE Healthcare Life Sciences). Each column was stored in 20% ethanol and  
326 washed with 5 column volumes (CV) of wash buffer (20 mM Tris pH 7.5, 500 mM NaCl, and 20  
327 mM imidazole) before loading samples onto the column. After sample application, columns were  
328 washed with 10 CV of wash buffer. Proteins were eluted from the column with 6 CV of elution  
329 buffer (20 mM Tris pH 7.5, 500 mM NaCl, and 250 mM imidazole). Proteins were concentrated  
330 and buffer exchanged into phosphate buffered saline (PBS) using Amicon Ultra-15 centrifugal  
331 filter units with a 30-kDa cutoff (Millipore Sigma).

332

### 333 **Trypsinization of hMPV F.**

334 In order to generate homogeneous cleaved trimeric hMPV F, TPCK (L-1-tosylamido-2-  
335 phenylethyl chloromethyl ketone)-trypsin (Thermo Scientific) was dissolved in double-distilled  
336 water (ddH<sub>2</sub>O) at 2 mg/mL. Purified hMPV B2 F was incubated with 5 TAME (p-toluene-sulfonyl-  
337 L-arginine methyl ester) units/mg of TPCK-trypsin for 1 hr at 37 °C. Trimeric and monomeric hMPV  
338 B2 F proteins were purified from the digestion reaction mixture by size exclusion chromatography  
339 on a Superdex S200, 16/600 column (GE Healthcare Life Sciences) in column buffer (50 mM Tris  
340 pH 7.5, and 100 mM NaCl). Trimeric hMPV B2 F protein was identified by a shift in the elution  
341 profile from monomeric hMPV B2 F protein. The fractions containing the trimers and monomers  
342 were concentrated using 30-kDa Spin-X UF concentrators (Corning).

343

344 **Negative-stain electron microscopy analysis.**

345 All samples were purified by size exclusion chromatography on a Superdex S200, 16/600 column  
346 (GE Healthcare Life Sciences) in column buffer before they were applied on grids. Carbon-coated  
347 copper grids (Electron Microscopy Sciences) were overlaid with 5  $\mu$ l of protein solutions (10  
348  $\mu$ g/mL) for 3 min. The grid was washed in water twice and then stained with 0.75% uranyl formate  
349 for 1 min. Negative-stain electron micrographs were acquired using a JEOL JEM1011  
350 transmission electron microscope equipped with a high-contrast 2K-by-2K AMT midmount digital  
351 camera.

352

353 **Generation of hMPV F-specific hybridomas.**

354 For hybridoma generation, 10 million peripheral blood mononuclear cells purified from the blood  
355 of human donors were mixed with 8 million previously frozen and gamma irradiated NIH 3T3 cells  
356 modified to express human CD40L, human interleukin-21 (IL-21), and human BAFF<sup>52</sup> in 80 mL  
357 StemCell medium A (StemCell Technologies) containing 6.3  $\mu$ g/mL of CpG (phosphorothioate-  
358 modified oligodeoxynucleotide ZOEZOEZZZZZOEZOEZZZT; Invitrogen) and 1  $\mu$ g/mL of  
359 cyclosporine (Sigma). The mixture of cells was plated in four 96-well plates at 200  $\mu$ l per well in  
360 StemCell medium A. After 6 days, culture supernatants were screened by ELISA for binding to  
361 recombinant hMPV B2 F protein, and cells from positive wells were electrofused as previously  
362 described.<sup>52</sup> Cells from each cuvette were resuspended in 20 mL StemCell medium A containing  
363 1 $\times$  HAT (hypoxanthine-aminopterin-thymidine; Sigma-Aldrich), 0.2 $\times$  HT (hypoxanthine-thymidine;  
364 Corning), and 0.3  $\mu$ g/mL ouabain (Thermo Fisher Scientific) and plated at 50  $\mu$ l per well in a 384-  
365 well plate. After 7 days, cells were fed with 25  $\mu$ l of StemCell medium A. The supernatant of  
366 hybridomas were screened after 2 weeks for antibody production by ELISA, and cells from wells  
367 with reactive supernatants were expanded to 48-well plates for 1 week in 0.5 mL of StemCell  
368 medium E (StemCell Technologies), before being screened again by ELISA. Positive hybridomas



369 were then subjected to single-cell fluorescence-activated sorting into 384-well plates containing  
370 75% of StemCell medium A plus 25% of StemCell medium E. Two weeks after cell sorting,  
371 hybridomas were screened by ELISA before further expansion of wells containing hMPV F-  
372 specific hybridomas.

373

#### 374 **Human mAb and Fab production and purification.**

375 For recombinant mAbs, plasmids encoding cDNAs for the heavy and light chain sequences of  
376 101F,<sup>64</sup> MPE8,<sup>49</sup> and DS7<sup>47</sup> were synthesized (GenScript), and cloned into vectors encoding  
377 human IgG1 and lambda or kappa light chain constant regions, respectively. mAbs were obtained  
378 by transfection of plasmids into Expi293F cells as described above. For hybridoma-derived mAbs,  
379 hybridoma cell lines were expanded in StemCell medium A until 80% confluent in 75-cm<sup>2</sup> flasks.  
380 Cells from one 75-cm<sup>2</sup> cell culture flask were collected with a cell scraper and expanded to 225-  
381 cm<sup>2</sup> cell culture flasks in serum-free medium (Hybridoma-SFM; Thermo Fisher Scientific).  
382 Recombinant cultures from transfection were stopped after 5 to 7 days, hybridoma cultures were  
383 stopped after 30 days. Culture supernatants from both approaches were filtered using 0.45 µm  
384 filters to remove cell debris. mAbs were purified directly from culture supernatants using HiTrap  
385 protein G columns (GE Healthcare Life Sciences) according to the manufacturer's protocol. To  
386 obtain Fab fragments, papain digestion was performed using the Pierce Fab preparation kit  
387 (Thermo Fisher Scientific) according to the manufacturer's protocol. Fab fragments were purified  
388 by removing IgG and Fc contaminants using a HiTrap MabSelectSure (GE Healthcare Life  
389 Sciences) column according to the manufacturer's protocol.

390

#### 391 **Isotype determination for human mAbs.**

392 For determination of mAb isotypes, 96-well Immulon HB 4× ELISA plates (Thermo Fisher  
393 Scientific) were coated with 2 µg/mL of each mAb in PBS (duplicate wells for each sample). The  
394 plates were incubated at 4 °C overnight and then washed once with water. Plates were blocked

395 with blocking buffer (2% nonfat milk, 2% goat serum in PBS with 0.05% Tween 20 (PBS-T)) and  
396 then left to incubate for 1 hr at room temperature. After incubation, the plates were washed three  
397 times with water. Isotype-specific antibodies obtained from Southern Biotech (goat anti-human  
398 kappa-alkaline phosphatase [AP] [catalog number 100244-340], goat anti-human lambda-AP  
399 [catalog number 100244-376], mouse anti-human IgG1 [Fc]-AP [catalog number 100245714],  
400 mouse anti-human IgG2 [Fc]-AP [catalog number 100245-734], mouse anti-human IgG3 [hinge]-  
401 AP [catalog number 100245-824], and mouse anti-human IgG4 [Fc]-AP [catalog number 100245-  
402 812]) were diluted 1:1,000 in blocking buffer, and 50  $\mu$ l of each solution was added to the  
403 respective wells. Plates were incubated for 1 h at room temperature and then washed five times  
404 with PBS-T. The PNPP substrate was prepared at 1 mg/mL in substrate buffer (1 M Tris base,  
405 0.5 mM MgCl<sub>2</sub>, pH 9.8), and 100  $\mu$ l of this solution was added to each well. Plates were incubated  
406 for 1 hr at room temperature and read at 405 nm on a BioTek plate reader.

407

#### 408 **RT-PCR for hybridoma mAb variable gamma chain and variable light chain.**

409 RNA was isolated from expanded hybridoma cells using the ENZA total RNA kit (Omega BioTek)  
410 according to the manufacturer's protocol. A Qiagen OneStep RT-PCR kit was used for cDNA  
411 synthesis and PCR amplification. For RT-PCR, 50  $\mu$ l reaction mixtures were designed with the  
412 following final concentrations: 1 $\times$  Qiagen OneStep RT-PCR buffer, 400  $\mu$ M deoxynucleoside  
413 triphosphate (dNTP) mix, 0.6  $\mu$ M primer mix, 2  $\mu$ l of Qiagen OneStep RT-PCR enzyme mix, 1  $\mu$ g  
414 total of the template RNA, and RNase-free water. Three separate sets of primer mixes were used:  
415 gamma, kappa and lambda forward and reverse primers as previously described<sup>65</sup>. The RT-PCR  
416 was performed in a thermocycler with the following program: 30 min at 50 °C, 15 min at 95 °C,  
417 and then a 3-step cycle with 30 repeats of denaturation for 30 s at 94 °C, annealing for 30 s at 50  
418 °C, and extension for 1 min at 72 °C, followed by 10 min of final extension at 72 °C. Samples were  
419 analyzed by agarose gel electrophoresis and purified PCR products (ENZA cycle pure kit; Omega  
420 Biotek) were cloned into the pCR2.1 vector using the Original TA cloning kit (Thermo Fisher

421 Scientific) according to the manufacturer's protocol. Plasmids were purified from positive DH5 $\alpha$   
422 colonies with ENZA plasmid DNA mini kit (Omega Biotek) and submitted to Genewiz for  
423 sequencing. Sequences were analyzed using IMG/VT-Quest.<sup>66</sup> For MPV458,  $2 \times 10^6$  of hybridoma  
424 cells were sent to GenScript for antibody variable domain sequencing.

425

426 **Enzyme-linked immunosorbent assay for binding to hMPV F proteins.** For recombinant  
427 protein capture ELISAs, 384-well plates (Greiner Bio-One) were treated with 2  $\mu$ g/ml of antigen in  
428 PBS for 1 h at 37°C or overnight at 4°C. Following this, plates were washed once with water  
429 before blocking for 1 hr with 2% blocking buffer. Primary mAbs or culture supernatants were  
430 applied to wells for 1 h following three washes with water. Plates were washed with water three  
431 times before applying 25  $\mu$ l secondary antibody (goat anti-human IgG Fc; Meridian Life Science)  
432 at a dilution of 1:4,000 in blocking solution. After incubation for 1 h, the plates were washed five  
433 times with PBS-T, and 25  $\mu$ l of a PNPP (p-nitrophenyl phosphate) solution (1 mg/ml PNPP in 1 M  
434 Tris base) was added to each well. The plates were incubated at room temperature for 1 hr before  
435 reading the optical density at 405 nm on a BioTek plate reader. Binding assay data were analyzed  
436 in GraphPad Prism using a nonlinear regression curve fit and the log(agonist)-versus-response  
437 function to calculate the binding EC<sub>50</sub> values.

438

439 **Experimental setup for biolayer interferometry.**

440 For all biosensors, an initial baseline in running buffer (PBS, 0.5% bovine serum albumin [BSA],  
441 0.05% Tween 20, 0.04% thimerosal) was obtained. Following this, 100  $\mu$ g/mL of His-tagged hMPV  
442 F protein was immobilized on anti-penta-HIS biosensor tips (FortéBio) for 120 s. For binding  
443 competition, the baseline signal was measured again for 60 s before biosensor tips were  
444 immersed into wells containing 100  $\mu$ g/mL of primary antibody for 300 s. Following this,  
445 biosensors were immersed into wells containing 100  $\mu$ g/mL of a second mAb for 300 s. Percent  
446 binding of the second mAb in the presence of the first mAb was determined by comparing the

447 maximal signal of the second mAb after the first mAb was added to the maximum signal of the  
448 second mAb alone. mAbs were considered noncompeting if maximum binding of the second mAb  
449 was  $\geq 66\%$  of its uncompleted binding. A level of between 33% and 66% of its uncompleted binding  
450 was considered intermediate competition, and  $\leq 33\%$  was considered competition. For affinity  
451 studies, hMPV B2 F or hMPV F 130-BV proteins were loaded as described above, and decreasing  
452 concentrations (100/75/50/12.5/0  $\mu\text{g}/\text{mL}$ ) of Fabs or IgGs were analyzed for binding by  
453 association for 120 s and dissociation for 600 s. Octet data analysis software was used to analyze  
454 the data. Values for reference wells containing no antibody were subtracted from the data, and  
455 affinity values were calculating using the local and partial fit curves function. Binding curves were  
456 independently graphed in GraphPad Prism for data visualization.

457

#### 458 **hMPV plaque neutralization assay.**

459 LLC-MK2 cells (ATCC CCL-7) were maintained in Opti-MEM (Thermo Fisher Scientific)  
460 supplemented with 2% fetal bovine serum and grown in 225-cm<sup>2</sup> flask at 37 °C in a CO<sub>2</sub> incubator.  
461 Two days prior to neutralization assays, cells were trypsinized and diluted in Opti-MEM at 80,000  
462 cells/mL, 0.5 mL of cells were seeded into 24-well plates. On the day of the experiment, serially  
463 diluted mAbs isolated from hybridoma supernatants were incubated 1:1 with a suspension of  
464 infectious hMPV B2 strain TN/93-32 or hMPV A2 strain CAN/97-83 for 1 hr. Following this, cells  
465 were inoculated with 50  $\mu\text{l}$  of the antibody-virus mixture for 1 hr with rocking at room temperature.  
466 Cells were then overlaid with 1 mL of 0.75% methylcellulose dissolved in Opti-MEM supplemented  
467 with 5  $\mu\text{g}/\text{mL}$  trypsin-EDTA and 100  $\mu\text{g}/\text{mL}$  CaCl<sub>2</sub>. Cells were incubated for 4 days, after which  
468 the cells were fixed with 10% neutral buffered formalin. The cell monolayers were then blocked  
469 with blocking buffer (2% nonfat milk supplemented with 2% goat serum in PBS-T) for 1 hr. The  
470 plates were washed with water, and 200  $\mu\text{l}$  of mouse anti-hMPV N primary antibody (catalog  
471 number C01851M; Meridian Biosciences) diluted 1:1,000 in blocking buffer was added to each  
472 well, and the plates were incubated for 1 hr. The plates were then washed three times with water,

473 after which 200  $\mu$ l of goat anti-mouse IgG-horseradish peroxidase (HRP) secondary antibody  
474 (catalog number 5220-0286; SeraCare) diluted 1:1,000 in blocking solution was added to each  
475 well for 1 hr. Plates were then washed five times with water, and 200  $\mu$ l of TrueBlue peroxidase  
476 substrate (SeraCare) was added to each well. Plates were incubated until plaques were clearly  
477 visible. Plaques were counted by hand under a stereomicroscope and compared to a virus-only  
478 control, and the data were analyzed in GraphPad Prism using a nonlinear regression curve fit and  
479 the log(inhibitor)-versus-response function to calculate the IC<sub>50</sub> values.

480

#### 481 **Western blot**

482 Protein samples in reducing condition were mixed with loading buffer containing  $\beta$ -  
483 mercaptoethanol and heated at 96 °C for 10 minutes before loading on 4-12% Bis-Tris Plus gels  
484 (Invitrogen). Samples in non-reducing conditions were diluted in loading buffer without any other  
485 treatment. Samples were transferred to PVDF membranes via iBlot system (Invitrogen) and  
486 blocked with 5% blocking buffer (5% nonfat milk, 2% goat serum in PBS-T) at 4 °C overnight.  
487 Primary antibodies were diluted at 0.5  $\mu$ g/mL in PBS-T and HRP-conjugated goat anti-human  
488 secondary antibody was diluted at 1:10,000 in PBS-T. Both incubations were 1 hour at room  
489 temperature with a 5x PBS-T wash in between. Substrate (Pierce ECL Western Blotting  
490 Substrate, Thermo Scientific) was added immediately before the image was taken with ChemiDoc  
491 Imaging System (BioRad).

492

#### 493 **Crystallization and structure determination of the MPV458 Fab + B2 F complex.**

494 To generate the complex of hMPV B2 F + MPV458 Fab complex, purified trypsinized B2 F trimer  
495 was added to MPV458 Fab at a 1:2 molar ratio and incubate at 4°C overnight. To crystallize the  
496 complex, the sample was subjected to size exclusion chromatography (S200, 16/300, GE  
497 Healthcare Life Sciences) in 50 mM Tris pH 7.5, 100 mM NaCl. The fractions containing the  
498 complex were concentrated to 15 mg/mL and crystallization trials were prepared on a TTP

499 LabTech Mosquito Robot in sitting-drop MRC-2 plates (Hampton Research) using several  
500 commercially available crystallization screens. Crystals were obtained in the Crystal Screen HT  
501 (Hampton Research) in condition F3 (0.5 M Ammonium sulfate, 0.1 M Sodium citrate tribasic  
502 dihydrate pH 5.6, 1.0 M Lithium sulfate monohydrate). Crystals were harvested and cryo-  
503 protected with 30% glycerol in the mother liquor before being flash frozen in liquid nitrogen. X-ray  
504 diffraction data were collected at the Advanced Photon Source SER-CAT beamline 21-ID-D. Data  
505 were indexed and scaled using XDS<sup>67</sup>. A molecular replacement solution was obtained in  
506 Phaser<sup>68</sup> using the hMPV pre-fusion F structure (PDB 5WB0) and the Fab structure (PDB 4Q9Q).  
507 The structure of the complex was completed by manually building in COOT<sup>69</sup> followed by  
508 subsequent rounds of manual rebuilding and refinement in Phenix<sup>68</sup>. The data collection and  
509 refinement statistics are shown in Table S3.

510

#### 511 **Flow cytometry of hMPV infected LLC-MK2 cells.**

512 LLC-MK2 cells were cultured in 75-cm<sup>2</sup> flask at 80-90% confluency, and then infected with hMPV  
513 (CAN/97-83) at 0.1 MOI in Opti-MEM containing 100 µg/mL CaCl<sub>2</sub> and 5 µg/mL Trypsin-EDTA.  
514 After 48 hours, cells were washed twice with PBS and digested with Versene (Gibco) at 37 °C for  
515 40-50 minutes. Cells were washed once with PBS then transferred to 1.5 mL tubes, pelleted and  
516 resuspended in 1 mL FACS buffer (PBS containing 5% FBS, inactivated 2% Human serum,  
517 inactivated 2% goat serum, 2 mM EDTA pH 8.0, 10% sodium azide) and incubated for 30 min to  
518 block Fc receptors. Cells were washed three times with PBS, then aliquoted in a 96 well U bottom  
519 plate for antibody staining. Mouse anti-human IgG Fc APC (BioLegend, 409306) was used for  
520 secondary antibody staining. Stained cells were fixed in 4% paraformaldehyde and data was  
521 collected with Beckman Coulter CytoFLEX flow cytometer. Data was analyzed in FlowJo.

522

## 523 **Acknowledgements**

524 These studies were supported by National Institutes of Health grants 1R01AI143865 and  
525 1K01OD026569. University of Georgia Office of the Vice President for Research, and by the  
526 National Center for Advancing Translational Sciences award number UL1TR002378.

527 X-ray data were collected at the Southeast Regional Collaborative Access Team (SER-CAT) 22-  
528 ID beamline at the Advanced Photon Source, Argonne National Laboratory. SER-CAT is  
529 supported by its member institutions (see [www.ser-cat.org/members.html](http://www.ser-cat.org/members.html)), and equipment grants  
530 (S10\_RR25528 and S10\_RR028976) from the National Institutes of Health. Use of the Advanced  
531 Photon Source was supported by the U.S. Department of Energy, Office of Science, Office of  
532 Basic Energy Sciences, under Contract No. W-31-109-Eng-38.

533 We thank Georgia Electron Microscopy at the University of Georgia for assistance with negative-  
534 stain electron microscopy, the University of Georgia Clinical and Translational Research Unit for  
535 assistance with donor identification and blood draws, and the University of Georgia Center for  
536 Tropical and Emerging Global Diseases flow cytometry core for assistance with cell sorting. This  
537 work was supported by the National Center for Advancing Translational Sciences of the National  
538 Institutes of Health under Award Number UL1TR002378. The content is solely the responsibility  
539 of the authors and does not necessarily represent the official views of the National Institutes of  
540 Health

541 The structure factors and structure coordinates were deposited to the Protein Data Bank under  
542 accession code XXXX.

543

544 **References**

- 545 1. Principi, N. & Esposito, S. Paediatric human metapneumovirus infection: Epidemiology,  
546 prevention and therapy. *J. Clin. Virol.* **59**, 141–147 (2014).
- 547 2. van den Hoogen, B. G. *et al.* A newly discovered human pneumovirus isolated from  
548 young children with respiratory tract disease. *Nat. Med.* **7**, 719–724 (2001).
- 549 3. Panda, S., Mohakud, N. K., Pena, L. & Kumar, S. Human metapneumovirus: Review of  
550 an important respiratory pathogen. *Int. J. Infect. Dis.* **25**, 45–52 (2014).
- 551 4. Falsey, A. R., Erdman, D., Anderson, L. J. & Walsh, E. E. Human metapneumovirus  
552 infections in young and elderly adults. *J. Infect. Dis.* **187**, 785–790 (2003).
- 553 5. van den Hoogen, B. G. *et al.* Prevalence and clinical symptoms of human  
554 metapneumovirus infection in hospitalized patients. *J. Infect. Dis.* **188**, 1571–1577 (2003).
- 555 6. Madhi, S. A., Ludewick, H., Abed, Y., Klugman, K. P. & Boivin, G. Human  
556 metapneumovirus-associated lower respiratory tract infections among hospitalized  
557 human immunodeficiency virus type 1 (HIV-1)-infected and HIV-1-uninfected African  
558 infants. *Clin. Infect. Dis.* **37**, 1705–1710 (2003).
- 559 7. Haas, L. E. M., Thijsen, S. F. T., van Elden, L. & Heemstra, K. A. Human  
560 metapneumovirus in adults. *Viruses* **5**, 87–110 (2013).
- 561 8. Larcher, C. *et al.* Human metapneumovirus infection in lung transplant recipients: Clinical  
562 presentation and epidemiology. *J. Hear. Lung Transpl.* **24**, 1891–1901 (2005).
- 563 9. Cane, P. A., van den Hoogen, B. G., Chakrabarti, S., Fegan, C. D. & Osterhaus, A. D.  
564 Human metapneumovirus in a haematopoietic stem cell transplant recipient with fatal  
565 lower respiratory tract disease. *Bone Marrow Transplant.* **31**, 309–310 (2003).
- 566 10. Dokos, C. *et al.* Fatal human metapneumovirus infection following allogeneic  
567 hematopoietic stem cell transplantation. *Transpl. Infect. Dis.* **15**, 97–101 (2013).
- 568 11. Shah, D. P., Shah, P. K., Azzi, J. M., El Chaer, F. & Chemaly, R. F. Human  
569 metapneumovirus infections in hematopoietic cell transplant recipients and hematologic



- 570 malignancy patients: A systematic review. *Cancer Lett.* **379**, 100–106 (2016).
- 571 12. Huck, B. *et al.* Human metapneumovirus infection in a hematopoietic stem cell transplant  
572 recipient with relapsed multiple myeloma and rapidly progressing lung cancer. *J. Clin.*  
573 *Microbiol.* **44**, 2300–2303 (2006).
- 574 13. Dokos, C. *et al.* Fatal human metapneumovirus infection following allogeneic  
575 hematopoietic stem cell transplantation. *Transpl. Infect. Dis.* **15**, E97–E101 (2013).
- 576 14. Peña, S. A. *et al.* Severe respiratory illness associated with human metapneumovirus in  
577 nursing home, New Mexico, USA. *Emerg. Infect. Dis.* **25**,  
578 <https://doi.org/10.3201/eid2502.181298> (2019).
- 579 15. Seynaeve, D. *et al.* Outbreak of Human Metapneumovirus in a Nursing Home: A Clinical  
580 Perspective. *J. Am. Med. Dir. Assoc.* **21**, 104-109.e1 (2020).
- 581 16. (CDC), C. for D. C. and P. Outbreaks of human metapneumovirus in two skilled nursing  
582 facilities -West Virginia and Idaho, 2011-2012. *MMWR. Morb. Mortal. Wkly. Rep.* **62**,  
583 909–913 (2013).
- 584 17. Lormeau, B. *et al.* Epidemiological survey in a day care center following toddler sudden  
585 death due to human metapneumovirus infection. *Arch. Pediatr.* **26**, 479–482 (2019).
- 586 18. Klein, M. B. *et al.* Viral pathogens including human metapneumovirus are the primary  
587 cause of febrile respiratory illness in HIV-infected adults receiving antiretroviral therapy. *J.*  
588 *Infect. Dis.* **201**, 297–301 (2010).
- 589 19. Kan-o, K. *et al.* Human metapneumovirus infection in chronic obstructive pulmonary  
590 disease: Impact of glucocorticosteroids and interferon. *J. Infect. Dis.* **215**, 1536–1545  
591 (2018).
- 592 20. Chan, P. K. S. *et al.* Human metapneumovirus-associated atypical pneumonia and  
593 SARS. *Emerg. Infect. Dis.* **10**, 497–500 (2004).
- 594 21. Lee, N. *et al.* Co-circulation of human metapneumovirus and SARS-associated  
595 coronavirus during a major nosocomial SARS outbreak in Hong Kong. *J. Clin. Virol.* **40**,

- 596 333–337 (2007).
- 597 22. Chan, P. K. S. *et al.* Human metapneumovirus detection in patients with severe acute  
598 respiratory syndrome. *Emerg. Infect. Dis.* **9**, 1058–1063 (2003).
- 599 23. Williams, J. V. *et al.* Human metapneumovirus and lower respiratory tract disease in  
600 otherwise healthy infants and children. *N. Engl. J. Med.* **350**, 2151–2160 (2004).
- 601 24. Van Den Hoogen, B. G. *et al.* Antigenic and genetic variability of human  
602 metapneumoviruses. *Emerg. Infect. Dis.* **10**, 658–666 (2004).
- 603 25. Masante, C. *et al.* The human metapneumovirus small hydrophobic protein has  
604 properties consistent with those of a viroporin and can modulate viral fusogenic activity. *J.*  
605 *Virology* **88**, 6423–6433 (2014).
- 606 26. Thammawat, S., Sadlon, T. A., Hallsworth, P. G. & Gordon, D. L. Role of cellular  
607 glycosaminoglycans and charged regions of viral G protein in human metapneumovirus  
608 infection. *J. Virol.* **82**, 11767–74 (2008).
- 609 27. Piyaratna, R., Tollefson, S. J. & Williams, J. V. Genomic analysis of four human  
610 metapneumovirus prototypes. *Virus Res.* **160**, 200–205 (2011).
- 611 28. Skiadopoulos, M. H., Buchholz, U. J., Surman, S. R., Collins, P. L. & Murphy, B. R.  
612 Individual contributions of the human metapneumovirus F , G , and SH surface  
613 glycoproteins to the induction of neutralizing antibodies and protective immunity. *Virology*  
614 **345**, 492–501 (2006).
- 615 29. Murata, Y., Lightfoote, P. M., Bear, J. N., Falsey, A. R. & Walsh, E. E. Humoral response  
616 to the central unglycosylated region of the respiratory syncytial virus attachment protein.  
617 *Vaccine* **28**, 6242–6246 (2010).
- 618 30. Chang, A., Masante, C., Buchholz, U. J. & Dutch, R. E. Human Metapneumovirus  
619 (HMPV) binding and infection are mediated by interactions between the HMPV fusion  
620 protein and heparan sulfate. *J. Virol.* **86**, 3230–3243 (2012).
- 621 31. Cseke, G. *et al.* Integrin alphavbeta1 promotes infection by human metapneumovirus.

- 622 *PNAS* **106**, 1566–1571 (2009).
- 623 32. Cox, R. G., Livesay, S. B., Johnson, M., Ohi, M. D. & Williams, J. V. The human  
624 metapneumovirus fusion protein mediates entry via an interaction with RGD-binding  
625 integrins. *J. Virol.* **86**, 12148–12160 (2012).
- 626 33. Cox, R. G. *et al.* Human metapneumovirus Is capable of entering cells by fusion with  
627 endosomal membranes. *PLoS Pathog.* **11**, e1005303 (2015).
- 628 34. Huang, J., Diaz, D. & Mousa, J. J. Antibody Epitopes of Pneumovirus Fusion Proteins.  
629 *Front. Immunol.* **10**, 2778 (2019).
- 630 35. Biacchesi, S. *et al.* Recombinant human metapneumovirus lacking the small hydrophobic  
631 SH and/or attachment G glycoprotein: Deletion of G yields a promising vaccine  
632 candidate. *J. Virol.* **78**, 12877–12887 (2004).
- 633 36. Battles, M. B. *et al.* Structure and immunogenicity of pre-fusion-stabilized human  
634 metapneumovirus F glycoprotein. *Nat. Commun.* **8**, 1528 (2017).
- 635 37. McLellan, J. S. *et al.* Structure-based design of a fusion glycoprotein vaccine for  
636 respiratory syncytial virus. *Science (80-. )*. **342**, 592–598 (2013).
- 637 38. Krarup, A. *et al.* A highly stable prefusion RSV F vaccine derived from structural analysis  
638 of the fusion mechanism. *Nat. Commun.* **6**, 8143 (2015).
- 639 39. Crank, M. C. *et al.* A proof of concept for structure-based vaccine design targeting RSV in  
640 humans. *Science (80-. )*. **365**, 505–509 (2019).
- 641 40. Schowalter, R. M., Smith, S. E. & Dutch, R. E. Characterization of human  
642 metapneumovirus F protein-promoted membrane fusion: critical roles for proteolytic  
643 processing and low pH. *J. Virol.* **80**, 10931–10941 (2006).
- 644 41. Más, V. *et al.* Engineering, structure and immunogenicity of the human metapneumovirus  
645 F protein in the postfusion conformation. *PLoS Pathog.* **12**, e1005859 (2016).
- 646 42. Gilman, M. S. A. *et al.* Rapid profiling of RSV antibody repertoires from the memory B  
647 cells of naturally infected adult donors. *Sci. Immunol.* **1**, 1–12 (2016).

- 648 43. Mousa, J. J., Kose, N., Matta, P., Gilchuk, P. & Crowe, J. E. A novel pre-fusion  
649 conformation-specific neutralizing epitope on the respiratory syncytial virus fusion protein.  
650 *Nat. Microbiol.* **2**, 16271 (2017).
- 651 44. Ngwuta, J. O. *et al.* Prefusion F – specific antibodies determine the magnitude of RSV  
652 neutralizing activity in human sera. *Sci. Transl. Med.* **7**, 309ra162 (2015).
- 653 45. Ulbrandt, N. D. *et al.* Isolation and characterization of monoclonal antibodies which  
654 neutralize human metapneumovirus in vitro and in vivo. *J. Virol.* **80**, 7799–7806 (2006).
- 655 46. Ulbrandt, N. D. *et al.* Identification of antibody neutralization epitopes on the fusion  
656 protein of human metapneumovirus. *J. Gen. Virol.* **89**, 3113–3118 (2008).
- 657 47. Williams, J. V. *et al.* A recombinant human monoclonal antibody to human  
658 metapneumovirus fusion protein that neutralizes virus in vitro and is effective  
659 therapeutically in vivo. *J. Virol.* **81**, 8315–8324 (2007).
- 660 48. Schuster, J. E. *et al.* A broadly neutralizing human monoclonal antibody exhibits in vivo  
661 efficacy against both human metapneumovirus and respiratory syncytial virus. *J. Infect.*  
662 *Dis.* **211**, 1–34 (2014).
- 663 49. Corti, D. *et al.* Cross-neutralization of four paramyxoviruses by a human monoclonal  
664 antibody. *Nature* **501**, 439–443 (2013).
- 665 50. Wen, X. *et al.* Structural basis for antibody cross-neutralization of respiratory syncytial  
666 virus and human metapneumovirus. *Nat. Microbiol.* **2**, 16272 (2017).
- 667 51. Mousa, J. J. *et al.* Human antibody recognition of antigenic site IV on Pneumovirus fusion  
668 proteins. *PLoS Pathog.* **14**, e1006837 (2018).
- 669 52. Bar-Peled, Y. *et al.* A potent neutralizing site III-specific human antibody neutralizes  
670 human metapneumovirus in vivo. *J. Virol.* **93**, e00342-19 (2019).
- 671 53. Wen, X. *et al.* Structure of the human metapneumovirus fusion protein with neutralizing  
672 antibody identifies a pneumovirus antigenic site. *Nat. Struct. Mol. Biol.* **19**, 461–463  
673 (2012).

- 674 54. Smith, S. A. & Crowe, J. E. Use of human hybridoma technology to isolate human  
675 monoclonal antibodies. *Microbiol. Spectr.* **3**, 1–12 (2015).
- 676 55. Lüsebrink, J. *et al.* High Seroprevalence of Neutralizing Capacity against Human  
677 Metapneumovirus in All Age Groups Studied in Bonn, Germany. *Clin. Vaccine Immunol.*  
678 **17**, 481 LP – 484 (2010).
- 679 56. Mousa, J. J. *et al.* Structural basis for nonneutralizing antibody competition at antigenic  
680 site II of the respiratory syncytial virus fusion protein. *PNAS* **113**, E6849–E6858 (2016).
- 681 57. Wu, S. J. *et al.* Characterization of the epitope for anti-human respiratory syncytial virus F  
682 protein monoclonal antibody 101F using synthetic peptides and genetic approaches. *J.*  
683 *Gen. Virol.* **88**, 2719–2723 (2007).
- 684 58. Bangaru, S. *et al.* A Site of Vulnerability on the Influenza Virus Hemagglutinin Head  
685 Domain Trimer Interface. *Cell* **177**, 1136-1152.e18 (2019).
- 686 59. Gilman, M. S. A. *et al.* Transient opening of trimeric prefusion RSV F proteins. *Nat.*  
687 *Commun.* **10**, 2105 (2019).
- 688 60. McLellan, J. S. *et al.* Structure of RSV fusion glycoprotein trimer bound to a prefusion-  
689 specific neutralizing antibody. *Science (80-. ).* **340**, 1113–1117 (2013).
- 690 61. Munro, J. B. *et al.* Conformational dynamics of single HIV-1 envelope trimers on the  
691 surface of native virions. *Science (80-. ).* **346**, 759 LP – 763 (2014).
- 692 62. Baquero, E. *et al.* Intermediate conformations during viral fusion glycoprotein structural  
693 transition. *Curr. Opin. Virol.* **3**, 143–150 (2013).
- 694 63. Lee, J. H. *et al.* Antibodies to a conformational epitope on gp41 neutralize HIV-1 by  
695 destabilizing the Env spike. *Nat. Commun.* **6**, 8167 (2015).
- 696 64. McLellan, J. S. *et al.* Structure of a major antigenic site on the respiratory syncytial virus  
697 fusion glycoprotein in complex with neutralizing antibody 101F. *J. Virol.* **84**, 12236–12244  
698 (2010).
- 699 65. Tiller, T. *et al.* Efficient generation of monoclonal antibodies from single human B cells by

- 700 single cell RT-PCR and expression vector cloning. *J. Immunol. Methods* **329**, 112–124  
701 (2008).
- 702 66. Brochet, X., Lefranc, M. P. & Giudicelli, V. IMGT/V-QUEST: the highly customized and  
703 integrated system for IG and TR standardized V-J and V-D-J sequence analysis. *Nucleic  
704 Acids Res.* **36**, 503–508 (2008).
- 705 67. Kabsch, W. Xds. *Acta Cryst.* **66**, 125–132 (2010).
- 706 68. Adams, P. D. *et al.* PHENIX: a comprehensive Python-based system for macromolecular  
707 structure solution. *Acta Cryst.* **66**, 213–21 (2010).
- 708 69. Emsley, P. & Cowtan, K. Coot: model-building tools for molecular graphics. *Acta Cryst.*  
709 **60**, 2126–32 (2004).
- 710
- 711

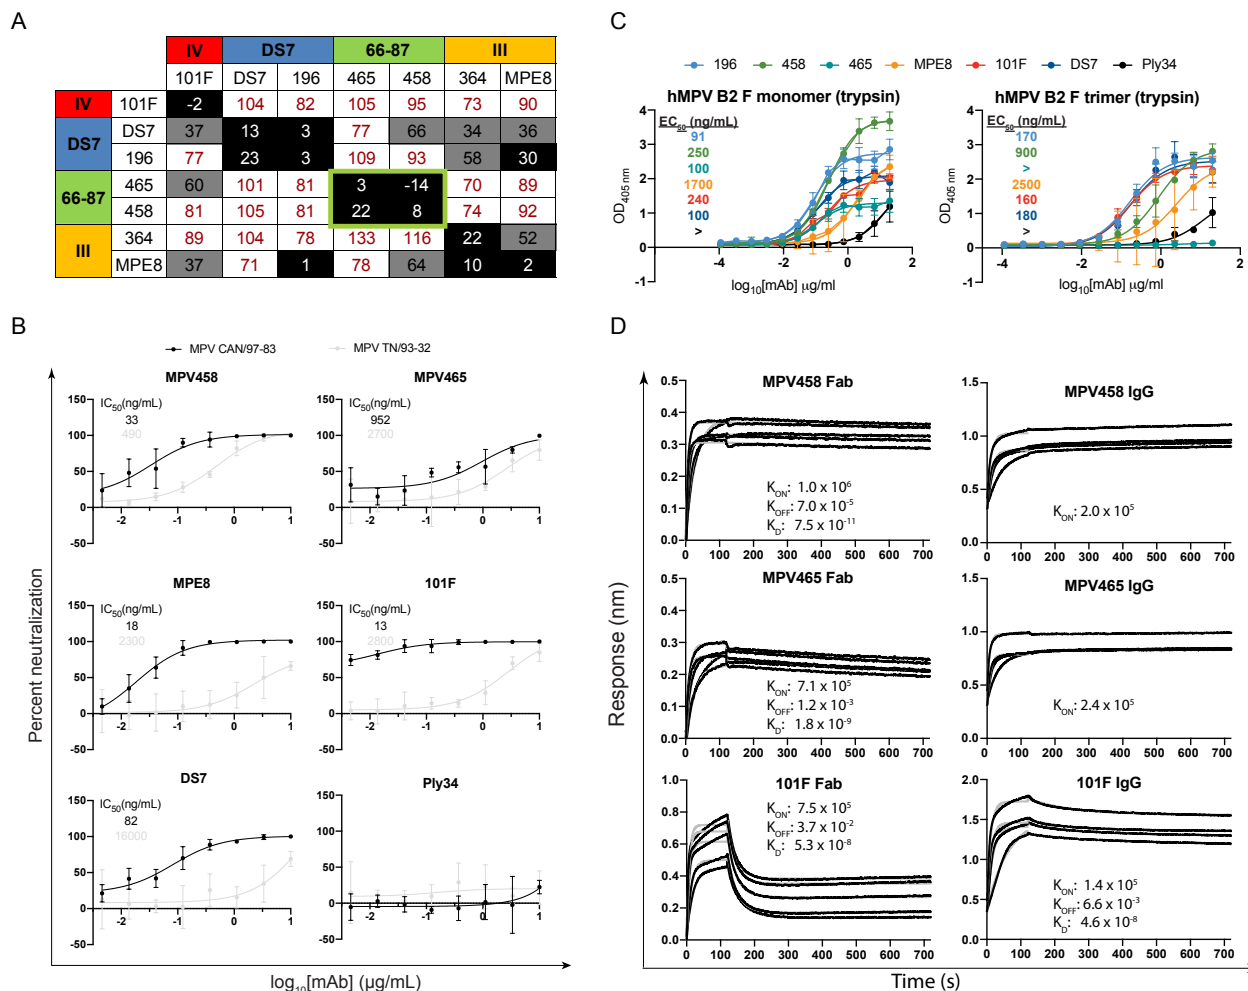

712  
713

714 **Figure 1. Binding and neutralizing properties of MPV458 and MPV465.** (A) Epitope binning  
715 of the hMPV F-specific mAb panel. Epitope control mAbs include 101F (site IV), DS7 and MPV196  
716 (DS7 epitope), and MPV364 and MPE8 (site III). MPV465 and MPV458 do not compete with  
717 known mAbs, and compete with each other for binding, suggesting both mAbs bind at a previously  
718 undiscovered antigenic site. Data indicate the percent binding of the competing antibody in the  
719 presence of the primary antibody, compared with the competing antibody alone. Cells filled in  
720 black indicate full competition, in which  $\leq 33\%$  of the uncompleted signal was observed; cells in  
721 gray indicate intermediate competition, in which the signal was between 33% and 66%; and cells  
722 in white indicate noncompetition, where the signal was  $\geq 66\%$ . Antigenic sites are highlighted at  
723 the top and side based on competition binding with the control mAbs. (B) Plaque neutralization  
724 curves for MPV458 and MPV465 with controls. Both MPV458 and MPV465 are neutralizing, while  
725 MPV458 has neutralizing properties similar to MPE8 and 101F.  $IC_{50}$  values are inlaid in each  
726 curve. The pneumococcal-specific antibody Ply34 was used as a negative control. Data points  
727 are the average of three replicates and error bars are 95% confidence intervals. Data are shown  
728 from one experiment and are representative of two independent experiments. A mAb was  
729 considered neutralizing if  $>50\%$  plaque reduction was observed at the highest concentration of  
730  $20 \mu\text{g/mL}$ . (C) ELISA binding curves for hMPV F-specific mAbs against monomeric and trimeric  
731 hMPV B2 F protein that was treated with trypsin. MPV458 and MPV465 have lower  $EC_{50}$  values  
732 (higher affinity) for monomeric hMPV B2 F than trimeric hMPV B2 F. Binding curves and  $EC_{50}$   
733 values are colored according to the legend. Each data point is the average of four replicates and

734 error bars represent 95% confidence intervals. Data are representative of one experiment from  
735 two independent experiments. (D) Binding curves from biolayer interferometry. hMPV 130-BV  
736 coated anti-penta-HIS biosensors were exposed to mAbs for 120 s before dissociating in buffer  
737 for 600 s. Binding constants are displayed within each graph. For mAbs that exhibited limited  
738 dissociation, only association constants are displayed.  
739



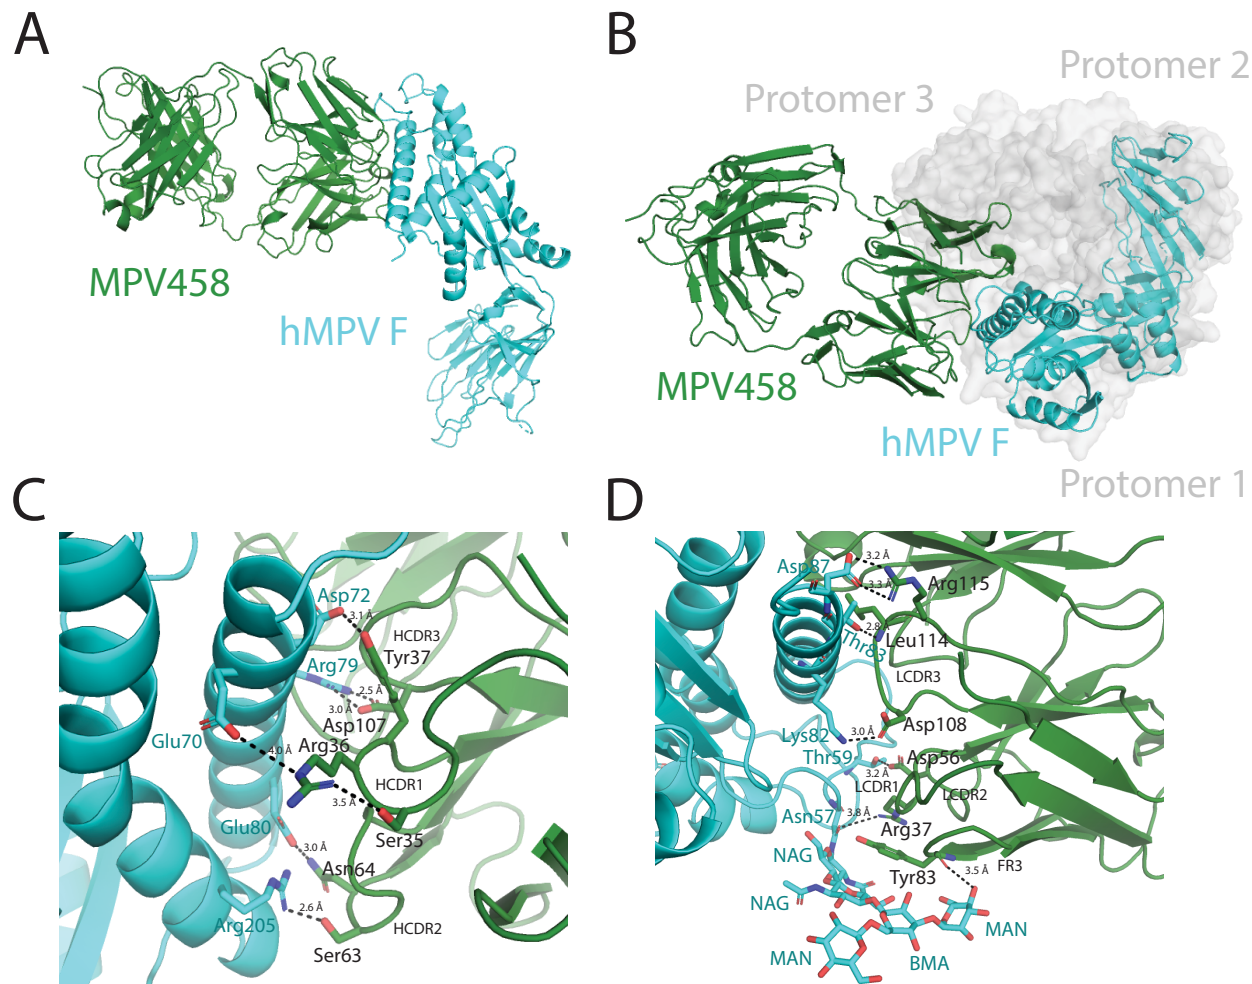

740  
741

742 **Figure 2. X-ray crystal structure of the hMPV B2 F + MPV458 Fab complex.** (A) The  
743 asymmetric unit of the complex is displayed. Monomeric hMPV B2 F co-crystallized with one Fab  
744 of MPV458. (B) Overlay of the hMPV B2 F + MPV458 Fab complex with the previously determined  
745 X-ray crystal structure of hMPV A1 F in the pre-fusion conformation (MPV 115-BV, PDB: 5WB0).  
746 The hMPV F protein from each structure were overlaid in PyMol. MPV458 clashes with the trimeric  
747 structure. (C) Hydrogen bonding events observed between hMPV B2 F and the MPV458 Fab  
748 heavy chain. (D) Hydrogen bonding events observed between hMPV B2 F and the MPV458 light  
749 chain. The MPV458 light chain also interacts with an extended glycan patch linked from Asn57.  
750 CDR is complementarity determining region, FR is framework region. MPV458 numbering is in  
751 IMGT format.  
752

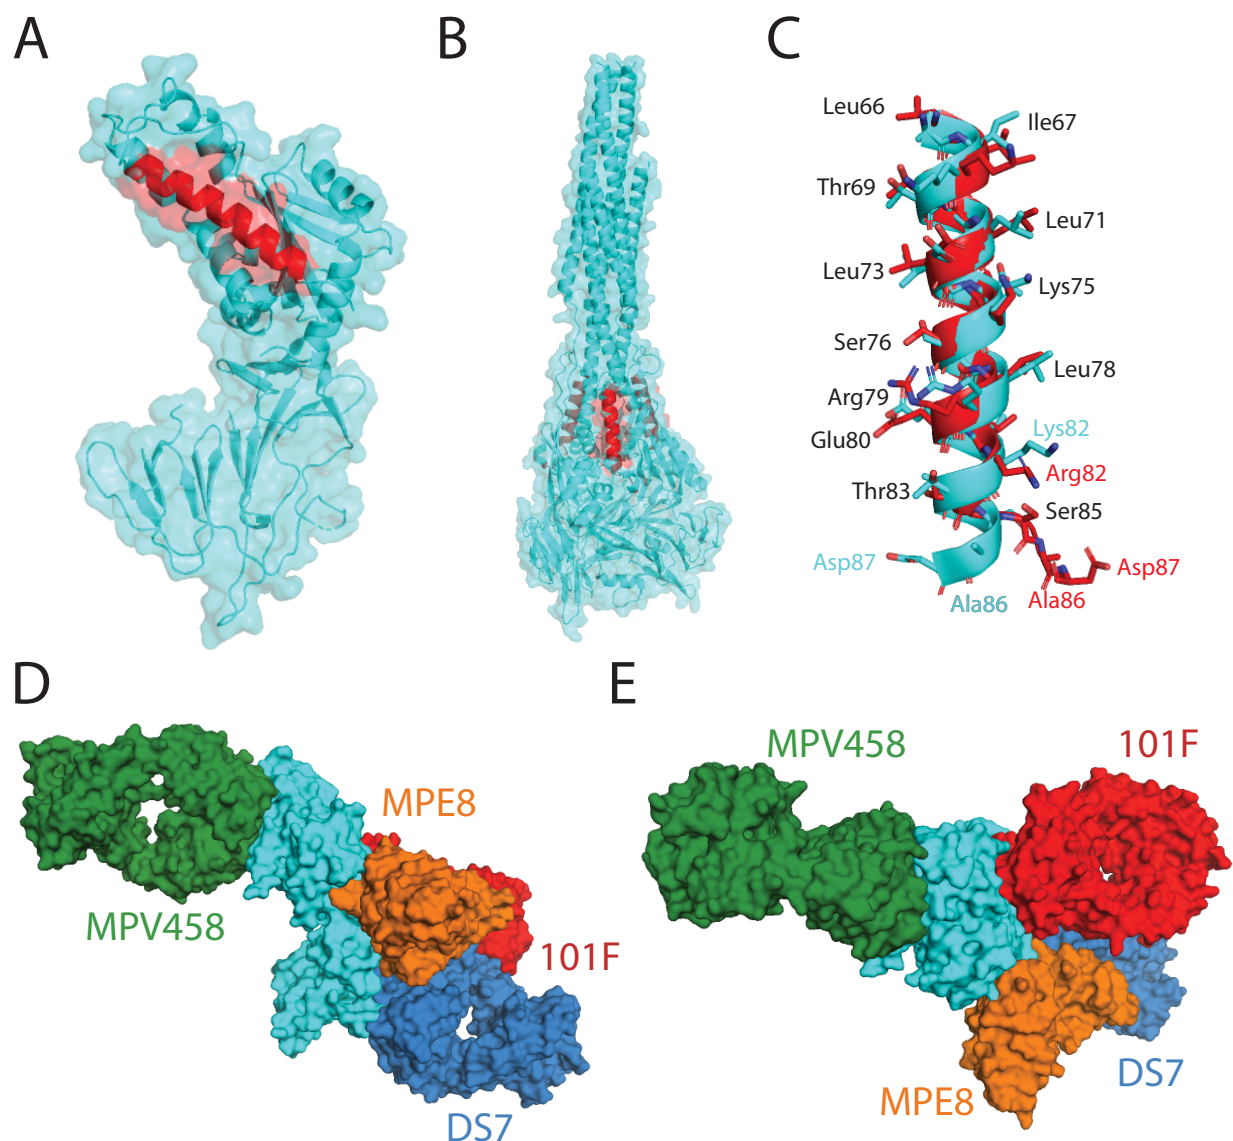

753  
754

755 **Figure 3. Structural comparison of the hMPV B2 F + MPV458 Fab complex.** (A) The X-ray  
756 crystal structure of pre-fusion hMPV F is shown with the 66-87 epitope colored in red (PDB ID:  
757 5WB0). (B) The corresponding 66-87 epitope is colored on the X-ray crystal structure of post-  
758 fusion hMPV F (5L1X). The 66-87 epitope is surface exposed on trimeric post-fusion hMPV F. (C)  
759 Structural overlay of the 66-87 region between pre-fusion (cyan) hMPV F from the hMPV B2 F +  
760 MPV458 Fab complex and post-fusion (red) hMPV F (PDB ID: 5L1X). Conserved amino acid  
761 residues between the B2 and A1 subgroups are listed in black, while residues that have mutations  
762 or shift positions are colored according to the corresponding structure. (D) Structural overlay of  
763 MPV458 on the hMPV F protein with previously structurally characterized hMPV F-specific mAbs.  
764 MPE8 (site III, orange) and 101F (site IV, red) were aligned onto hMPV F by aligning the  
765 corresponding RSV F residues onto hMPV F from the co-complex structures with RSV F (PDB  
766 ID: 5U68 and PDB ID: 3O45). DS7 was aligned from PDB 4DAG. (E) The structure overlay in (D)  
767 is rotated 90 degrees to view the hMPV F protein from the top down.
